# Supplementary material for: The Effect of a Structured Intervention to Improve Motor Skills in Preschool Children: Results of a Randomized Controlled Trial Nested in a Cohort Study of Danish Preschool Children, the MiPS Study
Source: MDPI journal article supplement (doi:10.3390/ijerph182312272), 2021-11-23

**File S2.** Scatter plots of change scores at follow-up vs. baseline values for each child, stratified by preschool. Within each pre-school, a regression line is fitted. Preschools from the intervention group are shown in red, preschools from the control group are shown in blue. In the title of each subgraph, the mean baseline value and the mean change score are shown for each preschool. The preschools are sorted by the mean value at baseline.

# MABC-2 Manual dexterity

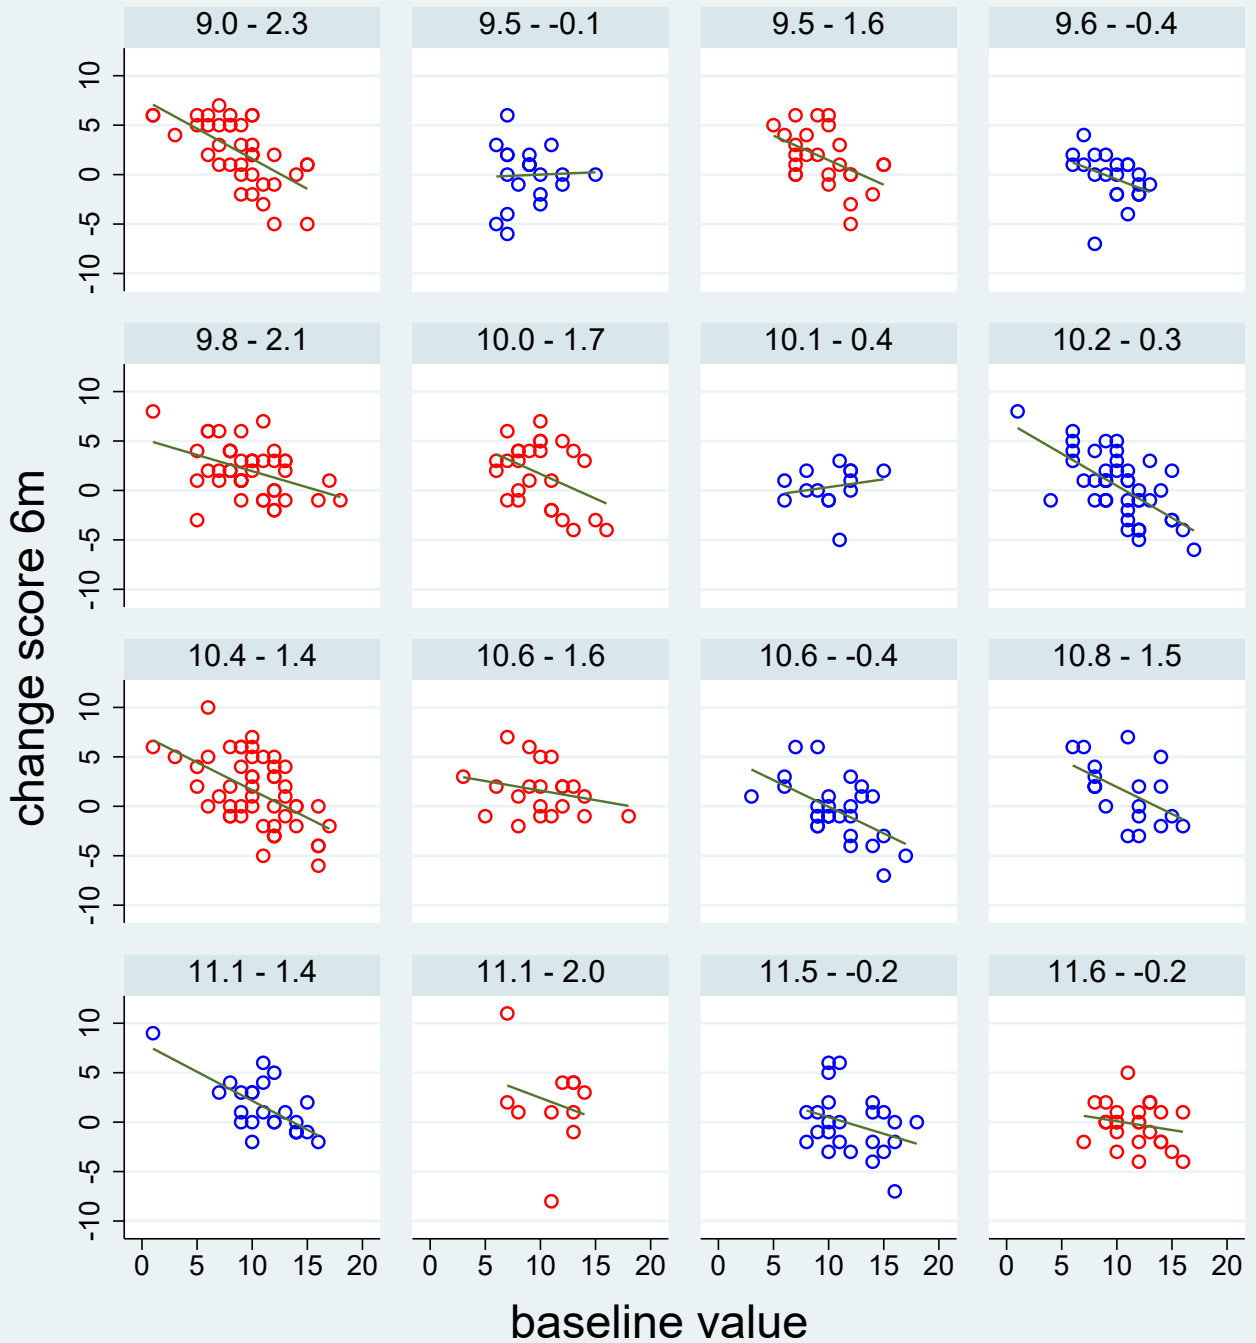

# MABC-2 Manual dexterity

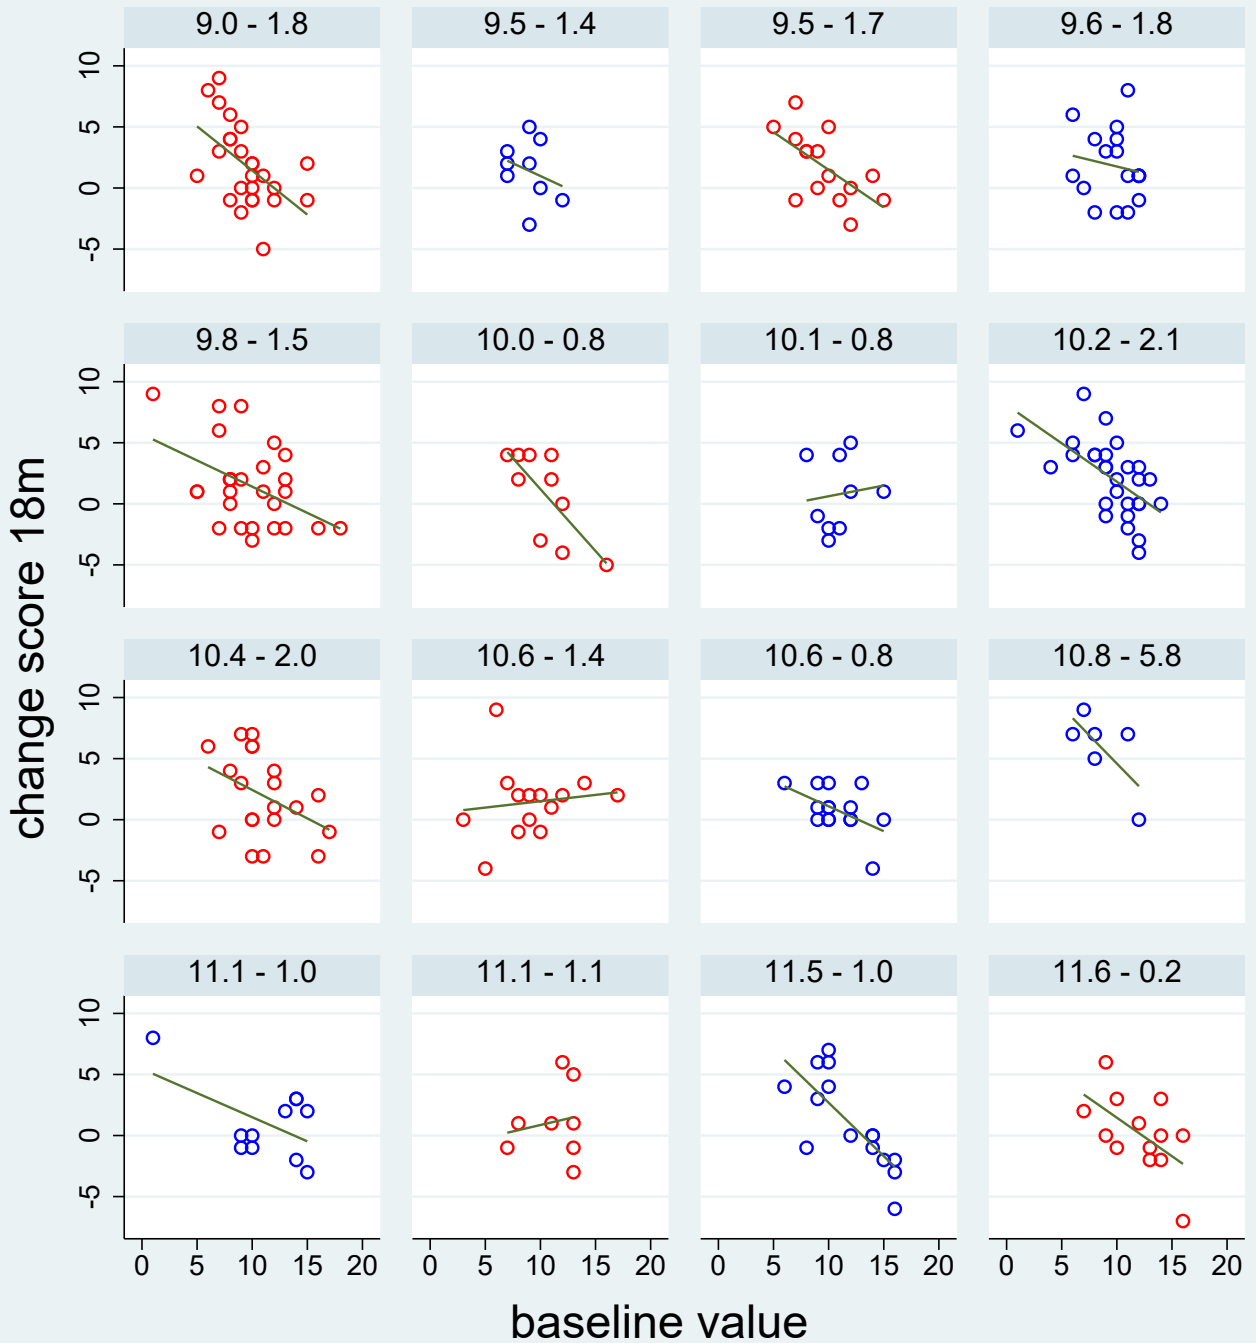

# MABC-2 Manual dexterity

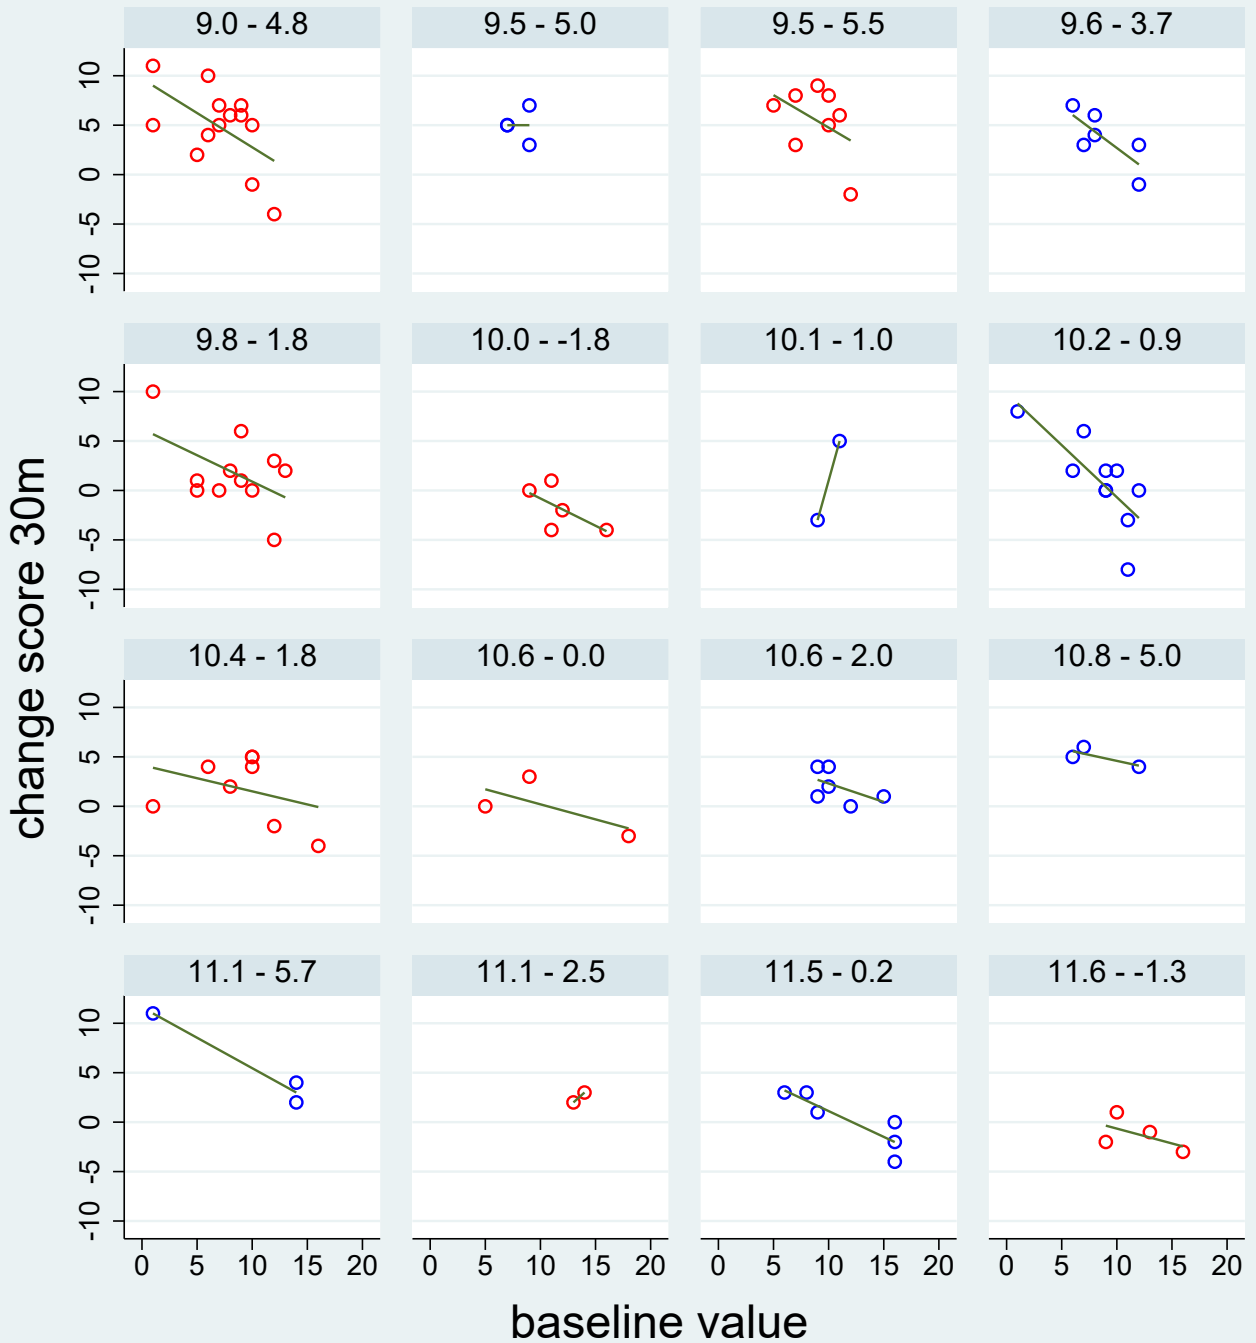

# MABC-2 Balance

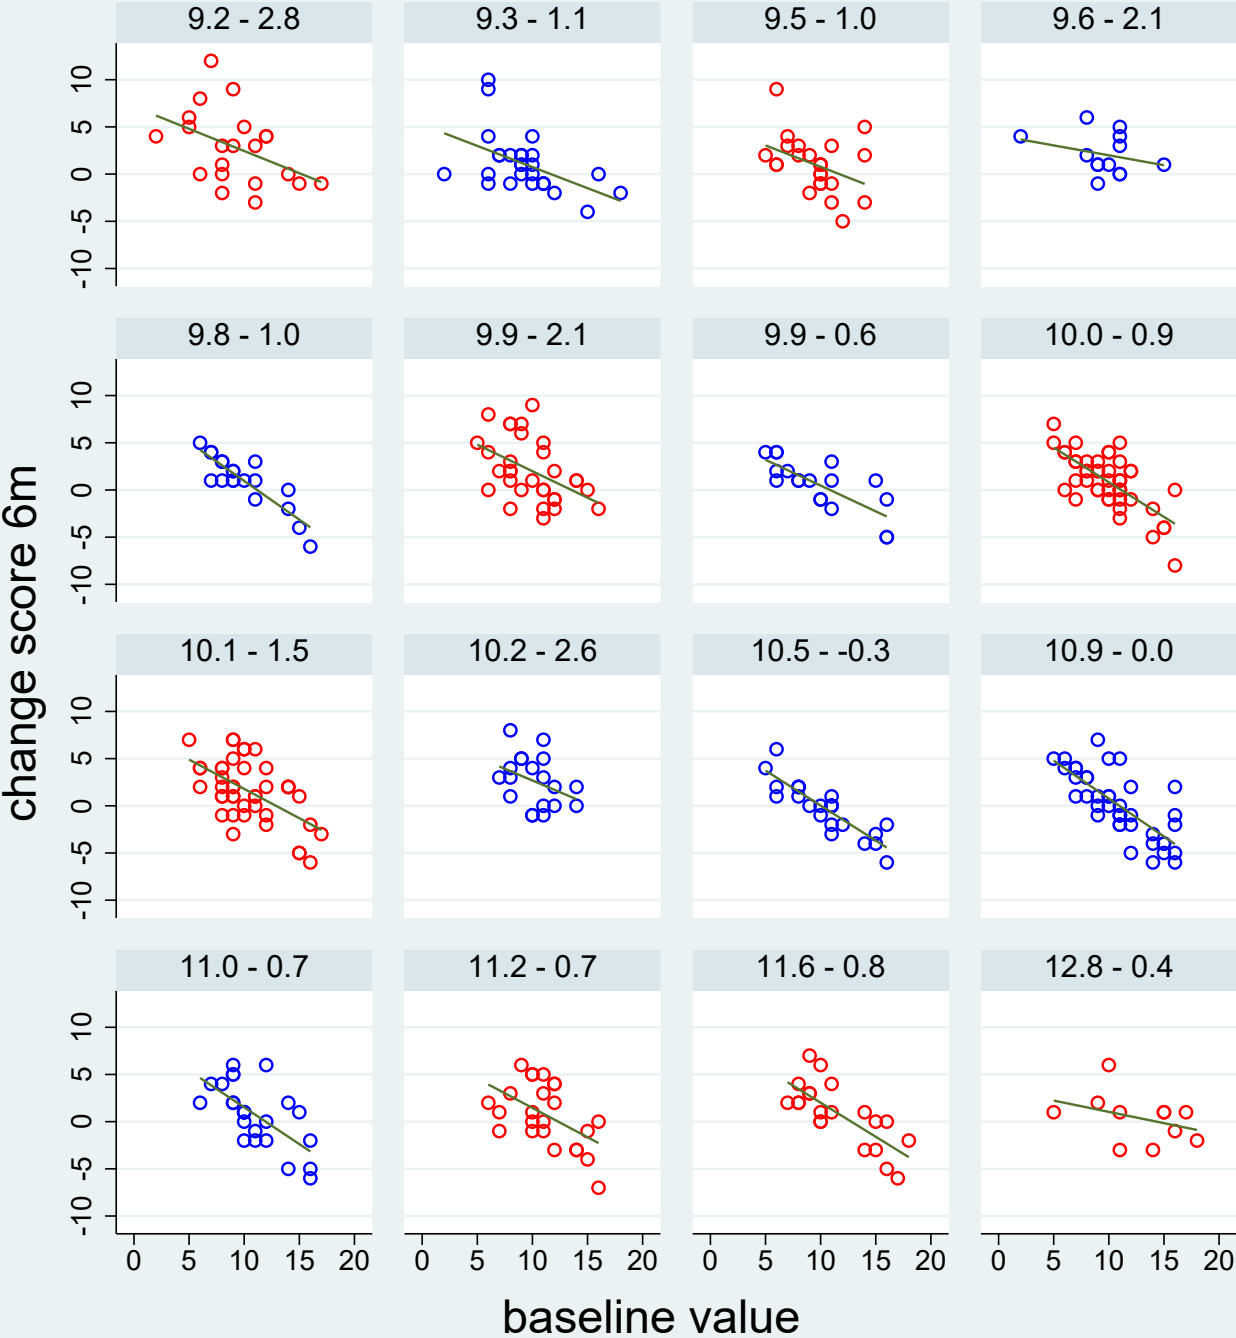

# MABC-2 Balance

change score 18m

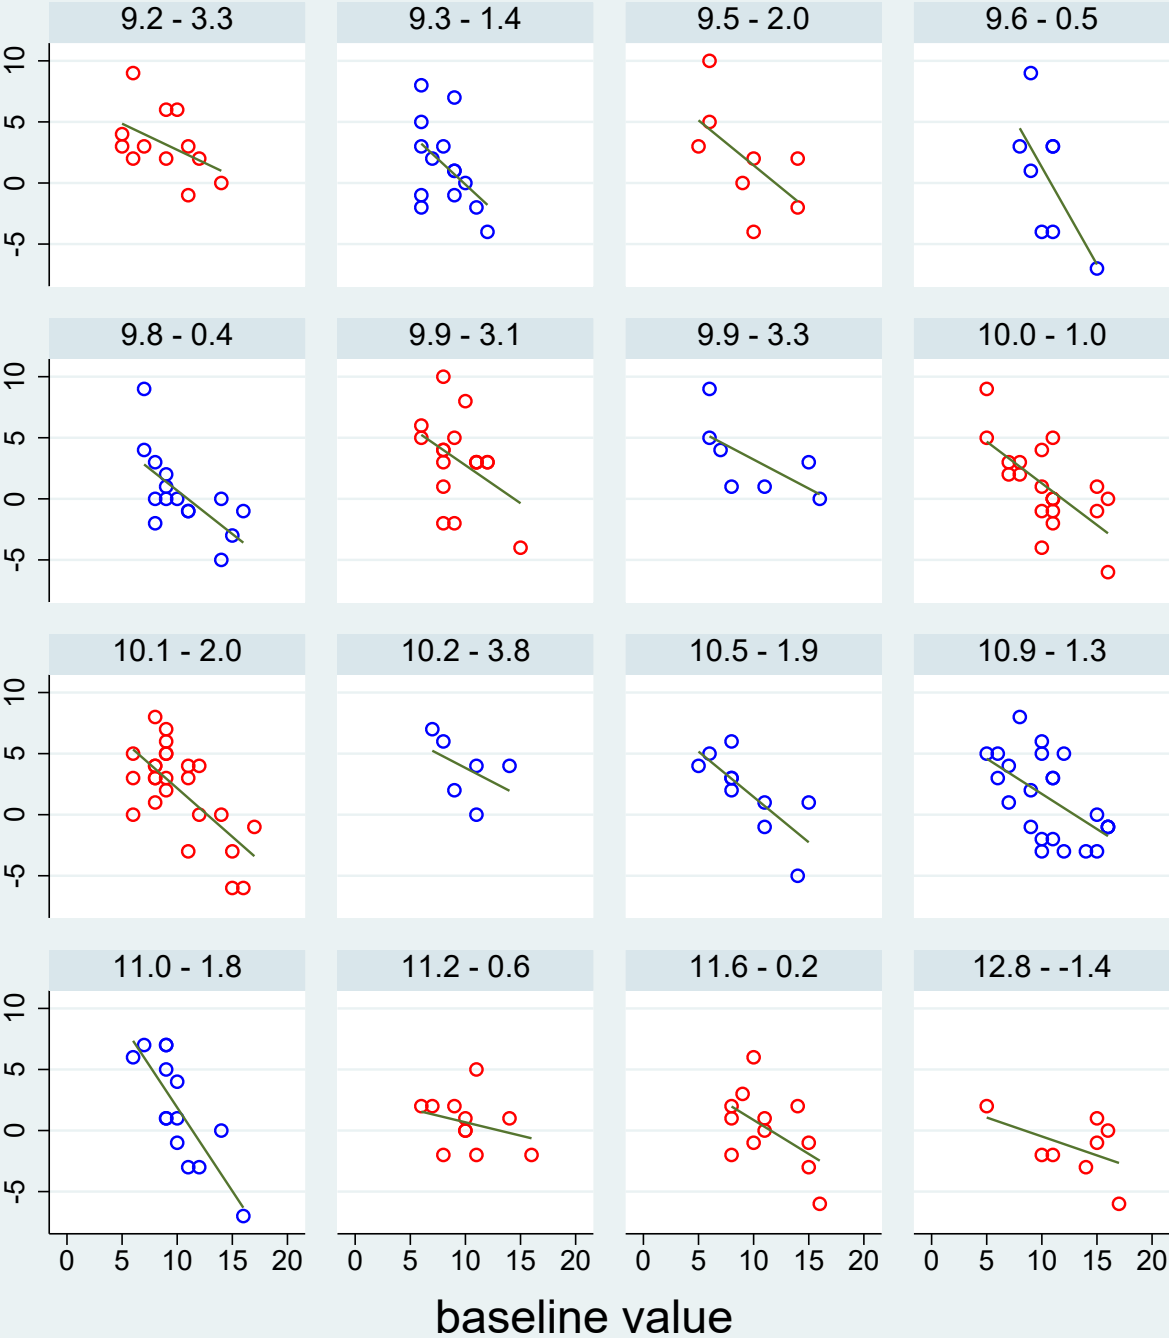

# MABC-2 Balance

change score 30m

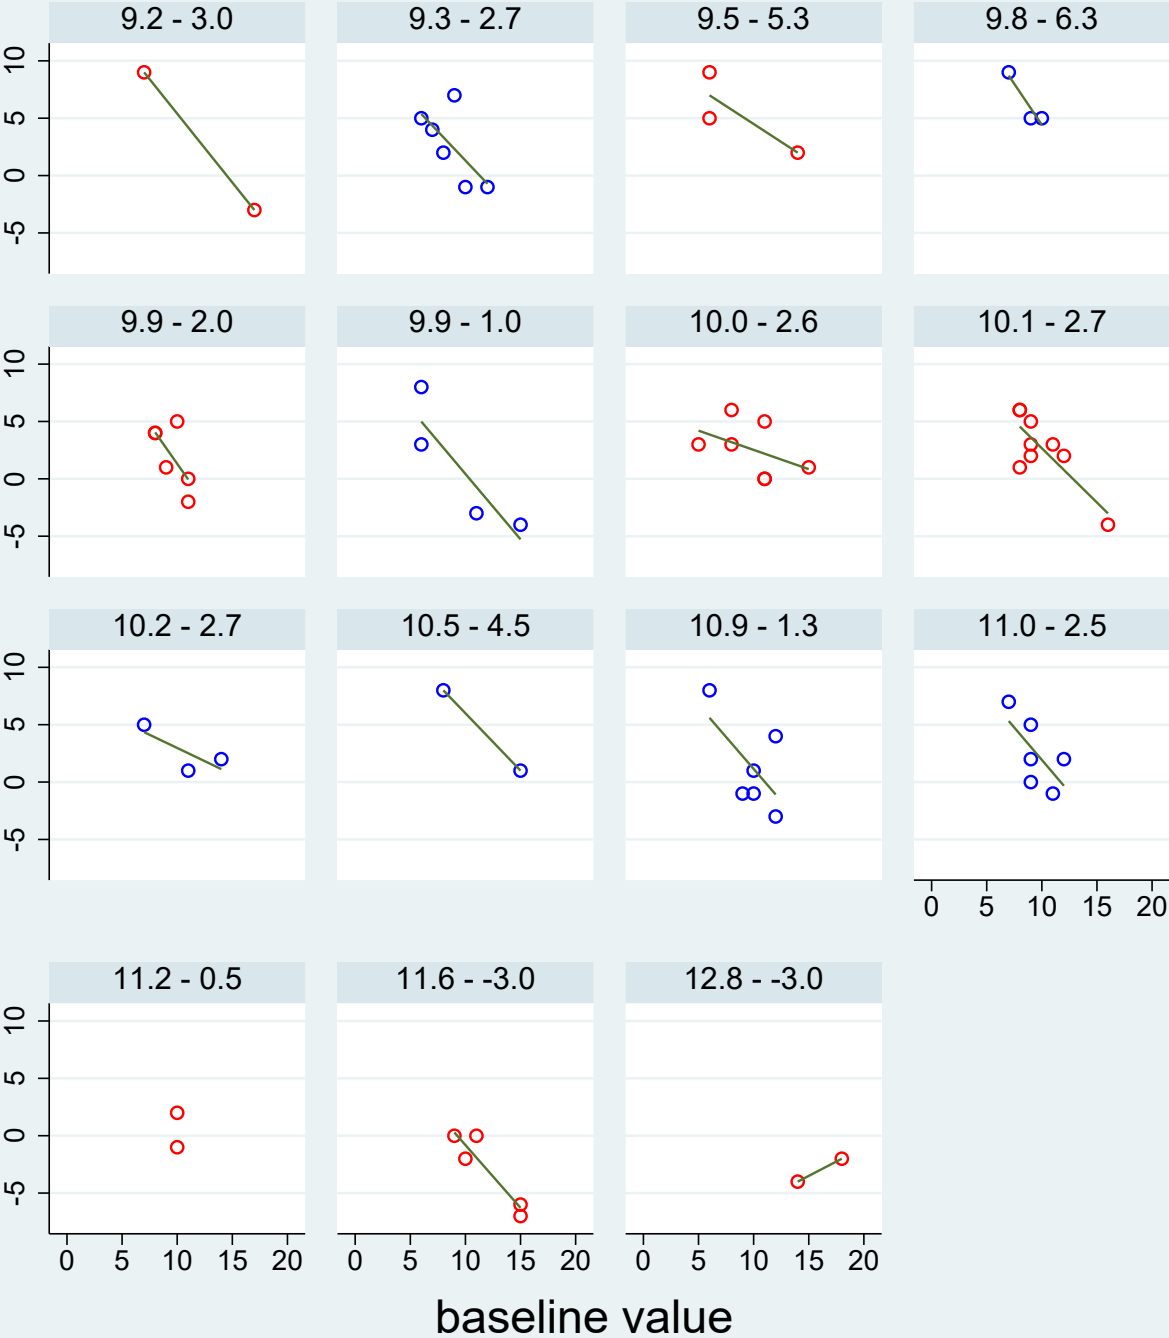

# MABC-2 Aim catch

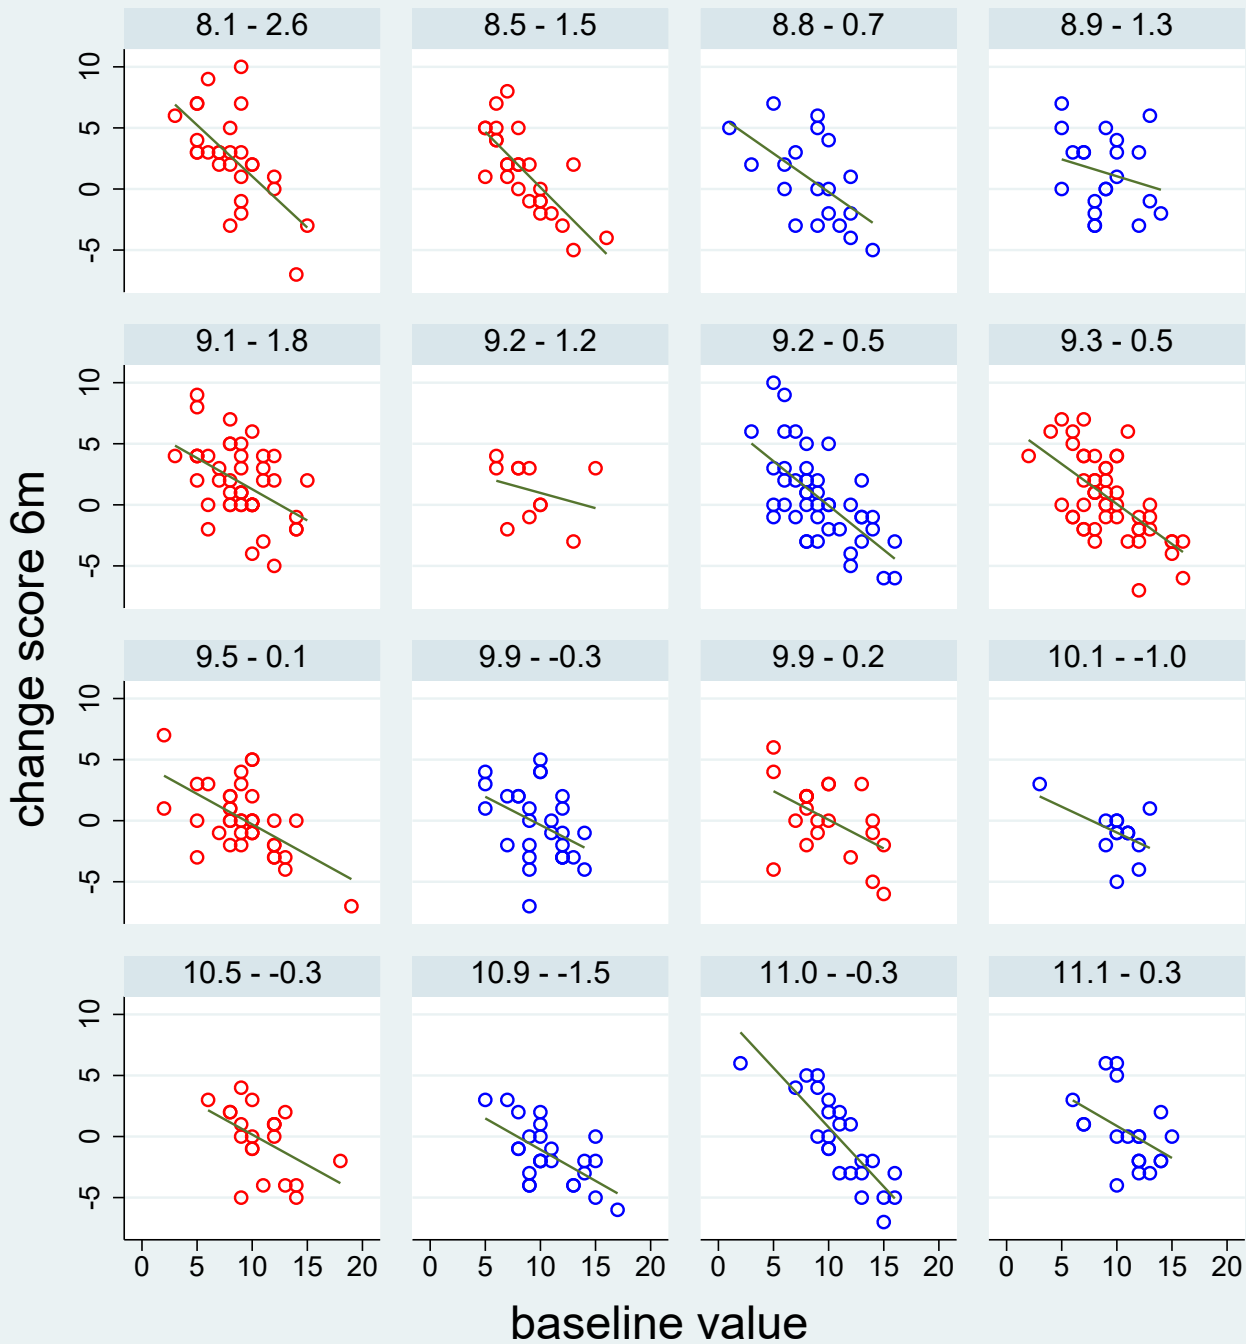



# MABC-2 Aim catch

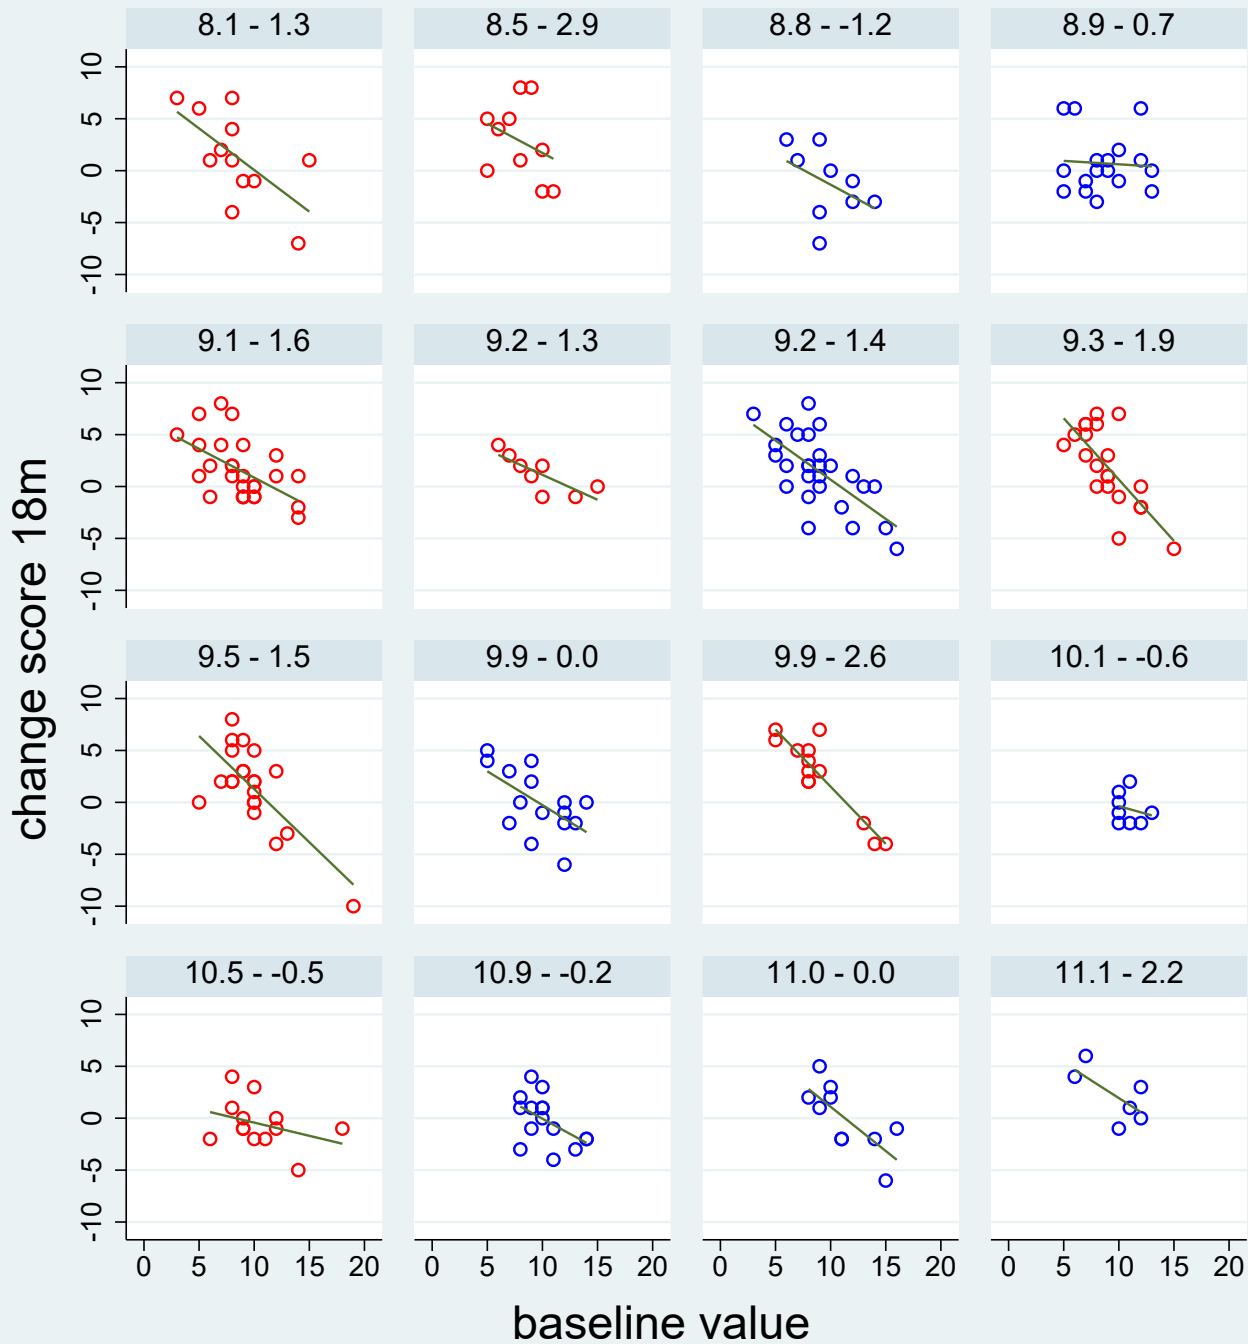

# MABC-2 Aim catch

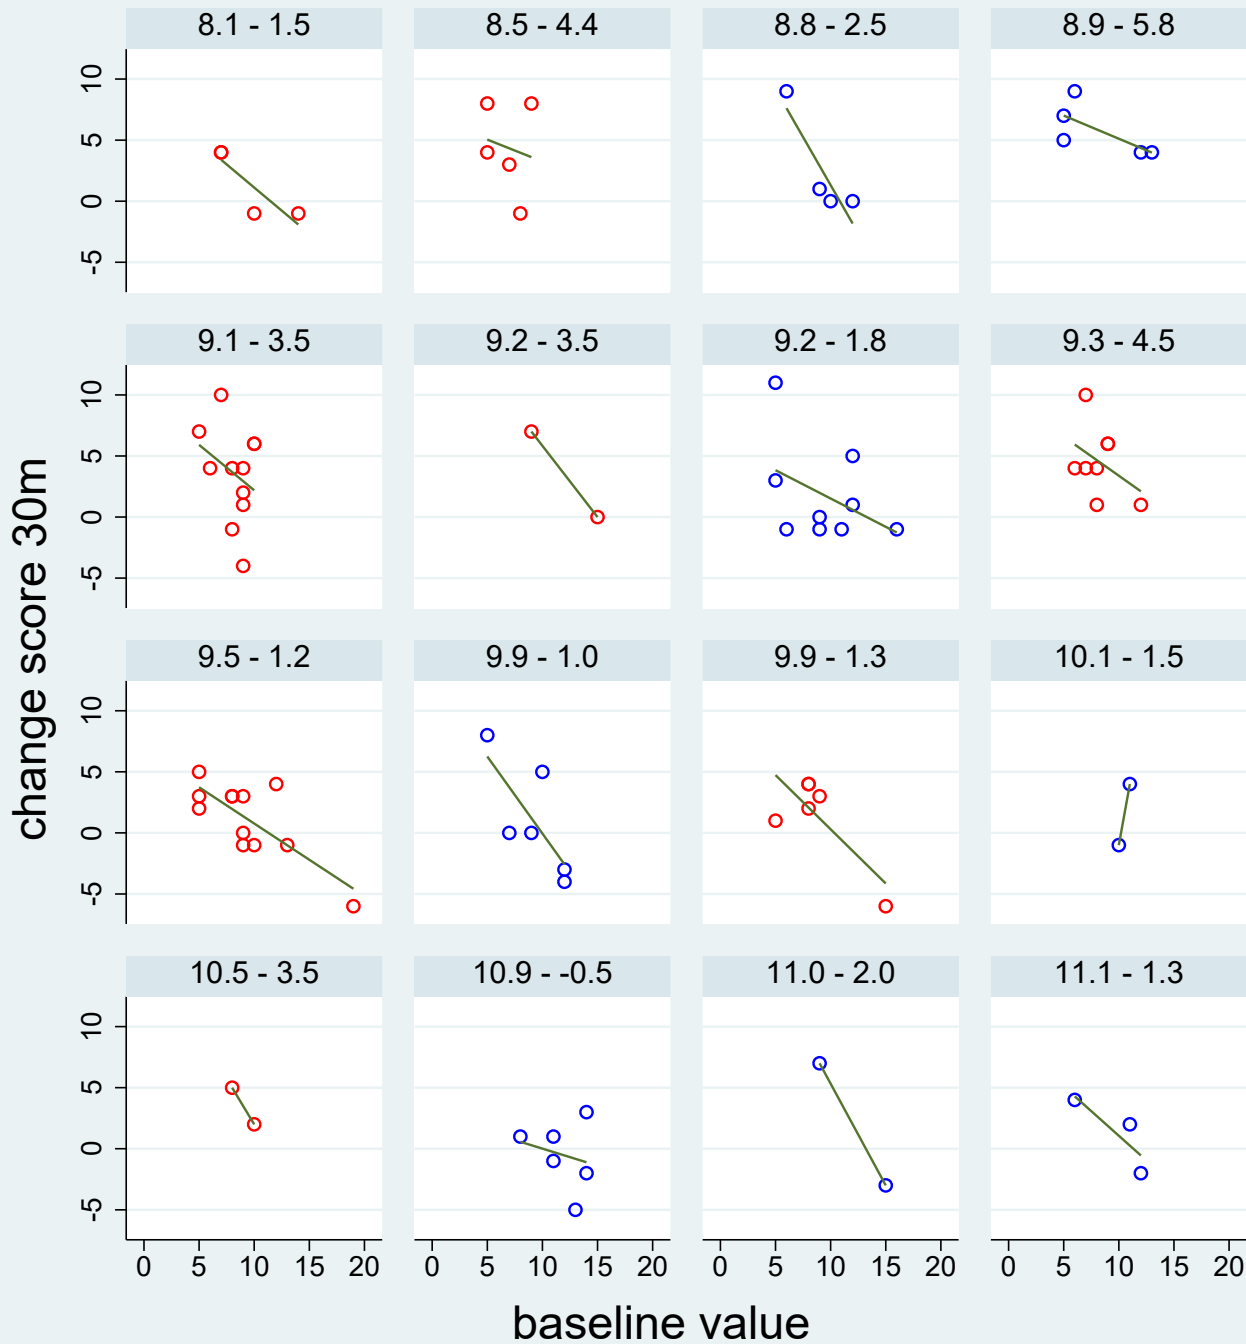

Supplement: s1 [file s1]
